# Supplementary material for: Being an Infant in a Pandemic: Influences of the COVID-19 Pandemic on Infants, Toddlers and Their Mothers in a Clinical Population
Source: MDPI journal article supplement (doi:10.3390/children10121885), 2023-12-01
Supplement: s1 [file s1]

## Supplementary Materials

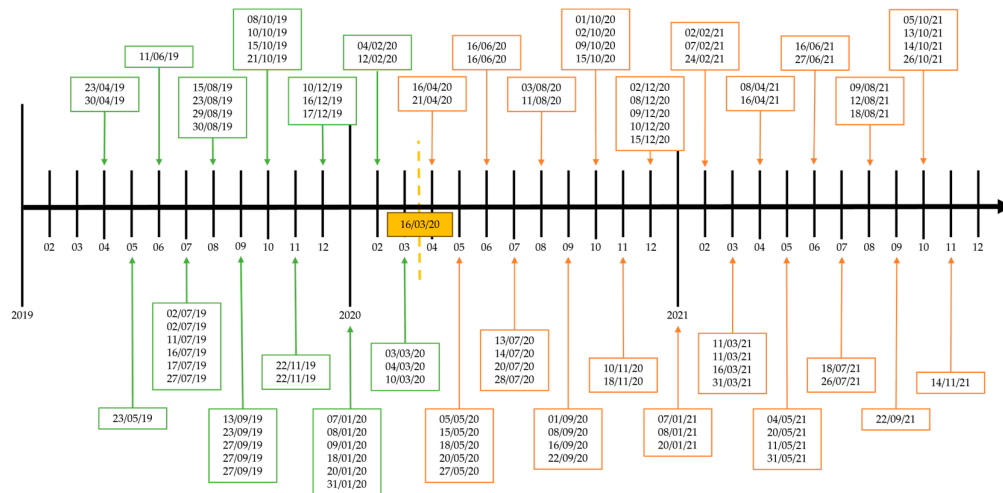

**Figure S1.** Participant's date of inclusion (dd/mm/yy); Green representing inclusion before the onset of the first German lockdown, orange the inclusion afterwards.

**Table S1** Infantile regulatory disorders according to the DC: 0–5™. Only considered disorders of infantile regulation are listed below.

| Sleeping, Eating and Crying Disorders                                            |
|----------------------------------------------------------------------------------|
| Sleep Onset                                                                      |
| Night Waking                                                                     |
| Partial Arousal                                                                  |
| Nightmares                                                                       |
| Overeating                                                                       |
| Undereating                                                                      |
| Atypical Eating                                                                  |
| Excessive Crying                                                                 |
| Other Sleep, Eating, and Excessive Crying Disorder of Infancy or Early Childhood |
| Mood Disorders                                                                   |
| Depression                                                                       |
| Dysregulated Anger and Aggression                                                |
| Other Mood Disorder                                                              |
| Anxiety Disorders                                                                |
| Separation Anxiety                                                               |

**Table S2.** Psychiatric disorders by DSM IV and ICD-10 evaluated by the M.I.N.I. psychiatric interview.

|                                           |
|-------------------------------------------|
| Major depressive episode: current         |
| Major depressive episode: lifetime        |
| Major depressive episode with melancholia |
| Dysthymia                                 |
| Suicidality                               |
| (Hypo-)manic episode: current             |
| (Hypo-)manic episode: lifetime            |
| Panic disorder: current                   |
| Panic disorder: lifetime                  |
| Panic disorder with few symptoms          |

---

Panic disorder without agoraphobia  
Panic disorder with agoraphobia  
Agoraphobia without former panic disorder  
Social phobia  
Obsessive-compulsive disorder  
Posttraumatic stress disorder  
Alcohol addiction  
Alcohol abuse  
Drug addiction  
Drug abuse  
Psychotic disorders  
Anorexia nervosa  
Anorexia nervosa: Binge-Eating  
Bulimia nervosa  
Generalized anxiety disorder  
Antisocial personality disorder

---
